# Supplementary material for: Modulating the relaxation dynamics of the Na2Mn3 system via an auxiliary anion change
Source: Royal Society of Chemistry journal article supplement (doi:10.1039/d1dt01237a), 2021-01-01
Supplement: d1dt01237a1.pdf [file d1dt01237a1.pdf]

## Supporting Information

### Modulating the Relaxation Dynamics of Na<sub>2</sub>Mn<sub>3</sub> Spin-Frustrated Magnets via an Auxiliary Anion Change<sup>†</sup>

Yongfei Li,<sup>‡a</sup> Xiao Sun,<sup>‡a</sup> Peiqiong Chen,<sup>a</sup> Hou-Ting Liu,<sup>a</sup> Jing Li,<sup>\*b</sup> Dan Liu,<sup>\*c</sup> Dacheng Li,<sup>a</sup> Jianmin Dou<sup>a</sup> and Haiquan Tian<sup>\*a</sup>

<sup>a</sup> Shandong Provincial Key Laboratory of Chemical Energy Storage and Novel Cell Technology, School of Chemistry and Chemical Engineering, Liaocheng University, Liaocheng 252059, P. R. China. E-mail: [tianhaiquan@lcu.edu.cn](mailto:tianhaiquan@lcu.edu.cn)

<sup>b</sup> State Key Laboratory of Physical Chemistry of Solid Surfaces, College of Chemistry and Chemical Engineering, Xiamen University, Xiamen 361005 P. R. China. E-mail: [jingli0107@xmu.edu.cn](mailto:jingli0107@xmu.edu.cn)

<sup>c</sup> Institute of Flexible Electronics, Northwestern Polytechnical University, 127 West Youyi Road, Xi'an, 710072, Shaanxi, China. E-mail: [iamdliu@nwpu.edu.cn](mailto:iamdliu@nwpu.edu.cn)

<sup>‡</sup> These authors contributed equally to this work.

**Table S1.** Selected bond lengths (Å) and angles (°) for **1**.

| Complex 1   |           |             |           |             |           |
|-------------|-----------|-------------|-----------|-------------|-----------|
| Mn1–O4      | 1.938(7)  | Mn1–O5      | 1.879(7)  | Mn1–O12     | 2.109(7)  |
| Mn1–O13     | 1.905(7)  | Mn1–N8      | 1.956(9)  | Mn1–N13     | 2.383(9)  |
| Mn2–O1      | 1.922(7)  | Mn2–O2      | 1.892(7)  | Mn2–O10     | 2.427(8)  |
| Mn2–O13     | 1.881(6)  | Mn2–N4      | 1.956(9)  | Mn3–O7      | 1.913(7)  |
| Mn3–O8      | 1.888(7)  | Mn3–O10     | 2.356(8)  | Mn3–O13     | 1.866(7)  |
| Mn3–N12     | 1.922(9)  | Mn3–N13     | 2.252(9)  | Na1–O1      | 2.423(7)  |
| Na1–O4      | 2.336(8)  | Na1–O7      | 2.384(7)  | Na1–N1      | 2.537(11) |
| Na1–N5      | 2.584(10) | Na1–N9      | 2.610(11) | Na2–O2      | 2.399(7)  |
| Na2–O3      | 2.496(8)  | Na2–O5      | 2.361(8)  | Na2–O6      | 2.507(10) |
| Na2–O8      | 2.412(9)  | Na2–O9      | 2.461(9)  | Mn1–O13–Mn2 | 128.1(4)  |
| Mn1–O13–Mn3 | 113.9(3)  | Mn2–O10–Mn3 | 83.3(3)   | Mn2–O13–Mn3 | 116.2(4)  |
| Mn1–O4–Na1  | 124.2(3)  | Mn1–O5–Na2  | 110.2(3)  | Mn2–O1–Na1  | 125.2(3)  |
| Mn2–O2–Na2  | 107.6(3)  | Mn3–O7–Na1  | 125.2(4)  | Mn3–O8–Na2  | 107.7(3)  |
| Mn1–N13–Mn3 | 85.9(3)   | Mn1···Mn2   | 3.404(4)  | Mn1···Mn3   | 3.160(6)  |
| Mn2···Mn3   | 3.180(5)  | Na1···Mn1   | 3.781(4)  | Na1···Mn2   | 3.864(2)  |
| Na1···Mn3   | 3.820(1)  | Na2···Mn1   | 3.488(8)  | Na2···Mn2   | 3.474(5)  |
| Na2···Mn3   | 3.486(1)  | Na1···Na2   | 6.260(6)  | Mn1–Mn2–Mn3 | 57.2(4)   |
| Mn1–Mn3–Mn2 | 64.9(4)   | Mn2–Mn1–Mn3 | 57.8(1)   | Na1–O10–Na2 | 178.1(2)  |

**Table S2.** Selected bond lengths (Å) and angles (°) for **2**.

| Complex 2   |           |             |           |             |           |
|-------------|-----------|-------------|-----------|-------------|-----------|
| Mn1–O7      | 1.906(10) | Mn1–O8      | 1.862(10) | Mn1–O10     | 1.894(8)  |
| Mn1–O11     | 2.105(10) | Mn1–N12     | 1.953(10) | Mn1–N16     | 2.368(12) |
| Mn2–O1      | 1.904(11) | Mn2–O2      | 1.874(10) | Mn2–O10     | 1.897(9)  |
| Mn2–N4      | 1.972(13) | Mn2–N13     | 2.261(12) | Mn2–N16     | 2.335(12) |
| Mn2–N17     | 2.878(14) | Mn3–O4      | 1.908(10) | Mn3–O5      | 1.868(11) |
| Mn3–O10     | 1.892(8)  | Mn3–O12     | 2.093(10) | Mn3–N8      | 2.018(12) |
| Mn3–N13     | 2.404(13) | Na1–O1      | 2.365(11) | Na1–O4      | 2.392(11) |
| Na1–O7      | 2.422(11) | Na1–N1      | 2.498(17) | Na1–N5      | 2.565(17) |
| Na1–N9      | 2.570(13) | Na2–O2      | 2.371(12) | Na2–O3      | 2.487(12) |
| Na2–O5      | 2.365(12) | Na2–O6      | 2.572(14) | Na2–O8      | 2.404(10) |
| Na2–O9      | 2.448(12) | Na2–O10     | 2.731(11) | Mn1–O7–Na1  | 126.3(4)  |
| Mn1–O8–Na2  | 107.5(8)  | Mn2–O1–Na1  | 125.2(5)  | Mn2–O2–Na2  | 108.6(5)  |
| Mn3–O4–Na1  | 124.4(5)  | Mn3–O5–Na2  | 110.8(5)  | Mn1–O10–Mn2 | 115.1(4)  |
| Mn1–O10–Mn3 | 129.8(4)  | Mn1–O10–Na2 | 95.0(4)   | Mn2–O10–Mn3 | 112.3(4)  |
| Mn2–O10–Na2 | 95.0(3)   | Mn3–O10–Na2 | 96.6(4)   | Mn2–N13–Mn3 | 84.8(4)   |
| Mn1–N16–Mn2 | 85.7(4)   | Mn1···Mn2   | 3.191(5)  | Mn1···Mn3   | 3.425(3)  |
| Mn2···Mn3   | 3.146(3)  | Na1···Mn1   | 3.864(9)  | Na1···Mn2   | 3.796(3)  |
| Na1···Mn3   | 3.811(4)  | Na2···Mn1   | 3.438(7)  | Na2···Mn2   | 3.444(1)  |
| Na2···Mn3   | 3.487(1)  | Na1···Na2   | 6.229(3)  | Mn1–Mn2–Mn3 | 65.4(2)   |
| Mn1–Mn3–Mn2 | 57.9(2)   | Mn2–Mn1–Mn3 | 56.6(5)   | Na1–O10–Na2 | 178.3(4)  |

**Table S3.** Mn<sup>II</sup> geometry analysis of **1** and **2** by SHAPE 2.1 software.

|                   | Complex 1                               |              |                                             | Complex 2    |                                 |        |
|-------------------|-----------------------------------------|--------------|---------------------------------------------|--------------|---------------------------------|--------|
| Geometry (CN = 6) | Mn1                                     | Mn2          | Mn3                                         | Mn1          | Mn2                             | Mn3    |
| <b>HP-6</b>       | 29.515                                  | 30.781       | 33.167                                      | 31.191       | 32.096                          | 29.724 |
| <b>PPY-6</b>      | 26.648                                  | 27.407       | 24.999                                      | 26.956       | 24.136                          | 26.702 |
| <b>OC-6</b>       | 1.259                                   | 1.188        | 1.951                                       | 1.230        | 1.964                           | 1.143  |
| <b>TPR-6</b>      | 14.656                                  | 15.361       | 13.992                                      | 14.447       | 13.758                          | 14.686 |
| <b>JPPY-6</b>     | 29.511                                  | 30.337       | 28.184                                      | 29.949       | 27.062                          | 29.787 |
| <b>Lable</b>      | <b>Shape</b>                            | <b>Lable</b> | <b>Shape</b>                                | <b>Lable</b> | <b>Shape</b>                    |        |
| HP-6              | Hexagon<br>(D <sub>6h</sub> )           | PPY-6        | Pentagonal<br>pyramid<br>(C <sub>5v</sub> ) | OC-6         | Octahedron<br>(O <sub>h</sub> ) |        |
| <b>Lable</b>      | <b>Shape</b>                            |              |                                             |              |                                 |        |
| TPR-6             | Trigonal<br>prism<br>(D <sub>3h</sub> ) |              |                                             |              |                                 |        |

**Table S4.** The selected energy level of complexes **1** and **2** without magnetic field.

|    | <b>Complex 1</b> | <b>Complex 2</b> |
|----|------------------|------------------|
| 1  | 0                | 0                |
| 2  | 7.5745E-14       | 3.78725E-14      |
| 3  | 16.2956          | 20.0849          |
| 4  | 16.2956          | 20.0849          |
| 5  | 20.7587          | 23.2902          |
| 6  | 20.7587          | 23.2902          |
| 7  | 22.728           | 23.8182          |
| 8  | 25.3224          | 23.8182          |
| 9  | 25.3224          | 29.2401          |
| 10 | 27.7375          | 31.336           |
| 11 | 27.7375          | 31.336           |
| 12 | 29.3502          | 31.6554          |
| 13 | 55.6594          | 59.3931          |
| 14 | 55.6594          | 59.3931          |
| 15 | 63.0455          | 62.7733          |
| 16 | 63.0455          | 62.7733          |
| 17 | 63.4825          | 68.8312          |
| 18 | 63.4825          | 68.8312          |
| 19 | 64.8999          | 75.7223          |
| 20 | 64.8999          | 75.7223          |

**Table S5.** Relaxation fitting parameters from least-squares fitting of  $\chi(\omega)$  data under zero  $dc$  field for **1**.

|     |                        | <b>FR</b>      |            |                          | <b>SR</b>      |            |                          |
|-----|------------------------|----------------|------------|--------------------------|----------------|------------|--------------------------|
| $T$ | $\chi_{s, \text{tot}}$ | $\Delta\chi_1$ | $\alpha_1$ | $\ln(\tau_1 / \text{s})$ | $\Delta\chi_2$ | $\alpha_2$ | $\ln(\tau_2 / \text{s})$ |
| 1.8 | -3.42                  | 16.87          | 0.287      | -1.92                    | 13.20          | 0.762      | -10.71                   |
| 2.0 | -5.75                  | 20.12          | 0.341      | -2.62                    | 5.35           | 0.547      | -11.01                   |
| 2.3 | -8.13                  | 24.74          | 0.386      | -3.30                    | 2.71           | 0.302      | -11.41                   |
| 2.6 | -10.87                 | 28.51          | 0.385      | -3.57                    | 2.22           | 0.208      | -11.70                   |
| 2.9 | -12.01                 | 30.47          | 0.356      | -3.80                    | 3.24           | 0.362      | -11.85                   |
| 3.2 | -15.14                 | 29.14          | 0.343      | -4.07                    | 3.79           | 0.403      | -11.92                   |
| 3.5 | -17.08                 | 29.07          | 0.321      | -4.13                    | 4.47           | 0.438      | -12.16                   |
| 4   | -20.88                 | 30.97          | 0.274      | -4.19                    | 5.62           | 0.504      | -12.33                   |
| 4.3 | -23.29                 | 30.66          | 0.284      | -4.35                    | 5.74           | 0.490      | -12.51                   |
| 4.6 | -25.31                 | 30.43          | 0.295      | -4.52                    | 6.00           | 0.464      | -12.71                   |
| 4.9 | -26.96                 | 31.80          | 0.255      | -4.76                    | 8.46           | 0.565      | -12.93                   |
| 5.5 | -27.71                 | 30.29          | 0.264      | -4.99                    | 8.56           | 0.583      | -13.11                   |
| 6.0 | -28.25                 | 31.43          | 0.251      | -5.16                    | 6.60           | 0.533      | -13.34                   |
| 6.5 | -29.80                 | 33.45          | 0.199      | -5.43                    | 6.96           | 0.619      | -13.58                   |
| 7.0 | -30.11                 | 32.79          | 0.224      | -5.54                    | 3.70           | 0.507      | -13.71                   |
| 7.5 | -30.38                 | 35.57          | 0.144      | -5.64                    | 5.45           | 0.697      | -13.98                   |
| 8.0 | -30.76                 | 34.35          | 0.170      | -5.76                    | 4.99           | 0.813      | -14.13                   |
| 8.5 | -31.02                 | 34.52          | 0.155      | -5.94                    | 4.60           | 0.816      | -14.30                   |

**Table S6.** Relaxation fitting parameters from least-squares fitting of  $\chi(\omega)$  data under zero  $dc$  field for **2**.

|      |                        | <b>FR</b>      |            |                          | <b>SR</b>      |            |                          |
|------|------------------------|----------------|------------|--------------------------|----------------|------------|--------------------------|
| $T$  | $\chi_{s, \text{tot}}$ | $\Delta\chi_1$ | $\alpha_1$ | $\ln(\tau_1 / \text{s})$ | $\Delta\chi_2$ | $\alpha_2$ | $\ln(\tau_2 / \text{s})$ |
| 1.8  | 8.88                   | 11.67          | 0.077      | -6.19                    | -4.20          | 0.336      | 6.56                     |
| 2.0  | 7.59                   | 11.45          | 0.070      | -6.20                    | -3.97          | 0.340      | -6.60                    |
| 2.3  | 6.31                   | 10.81          | 0.090      | -6.23                    | -4.05          | 0.335      | -6.67                    |
| 2.6  | 5.45                   | 10.18          | 0.133      | -6.31                    | -4.12          | 0.350      | -6.81                    |
| 2.9  | 4.96                   | 9.50           | 0.178      | -6.35                    | -4.13          | 0.367      | -7.07                    |
| 3.2  | 4.23                   | 8.99           | 0.241      | -6.41                    | -4.15          | 0.405      | -7.31                    |
| 3.5  | 3.96                   | 8.28           | 0.255      | -6.50                    | -4.15          | 0.401      | -7.46                    |
| 4    | 3.50                   | 7.57           | 0.220      | -6.69                    | -4.45          | 0.336      | -7.71                    |
| 4.3  | 3.38                   | 7.48           | 0.301      | -6.80                    | -4.37          | 0.408      | -7.86                    |
| 4.6  | 3.04                   | 7.36           | 0.365      | -6.93                    | -4.42          | 0.470      | -8.23                    |
| 4.9  | 2.81                   | 7.89           | 0.419      | -7.17                    | 4.18           | 0.524      | -8.67                    |
| 5.5  | 2.54                   | 8.56           | 0.457      | -7.41                    | -3.99          | 0.576      | -9.07                    |
| 6.0  | 2.09                   | 8.24           | 0.464      | -7.62                    | -3.99          | 0.594      | -9.45                    |
| 6.5  | 1.93                   | 8.44           | 0.441      | -7.86                    | -3.98          | 0.551      | -9.82                    |
| 7.0  | 1.72                   | 8.80           | 0.458      | -7.99                    | -3.92          | 0.569      | -10.05                   |
| 7.5  | 1.56                   | 9.91           | 0.462      | -8.19                    | -3.87          | 0.569      | -10.31                   |
| 8.0  | 1.40                   | 11.22          | 0.450      | -8.42                    | -3.96          | 0.540      | -10.66                   |
| 8.5  | 1.35                   | 10.33          | 0.473      | -8.63                    | -3.90          | 0.582      | -10.79                   |
| 9.0  | 1.26                   | 10.73          | 0.456      | -8.81                    | -3.90          | 0.530      | -10.95                   |
| 10.0 | 1.18                   | 11.56          | 0.449      | -9.14                    | -3.95          | 0.543      | -11.12                   |
| 11.0 | 1.03                   | 11.51          | 0.459      | -9.34                    | -3.94          | 0.593      | -11.35                   |
| 12.0 | 0.09                   | 12.04          | 0.437      | -9.60                    | -3.93          | 0.524      | -11.57                   |
| 13.0 | 0.07                   | 11.91          | 0.443      | -9.95                    | -3.92          | 0.534      | -11.67                   |
| 14.0 | 0.03                   | 12.02          | 0.448      | -10.12                   | -3.91          | 0.526      | -11.80                   |
| 15.0 | -0.06                  | 12.23          | 0.430      | -10.33                   | -3.87          | 0.470      | -11.92                   |
| 16.0 | -0.11                  | 12.41          | 0.426      | -10.53                   | -3.82          | 0.441      | -12.04                   |
| 17.0 | -0.18                  | 12.33          | 0.436      | -10.75                   | -3.85          | 0.495      | -12.10                   |
| 18.0 | -0.21                  | 12.49          | 0.425      | -10.97                   | -3.89          | 0.507      | -12.16                   |

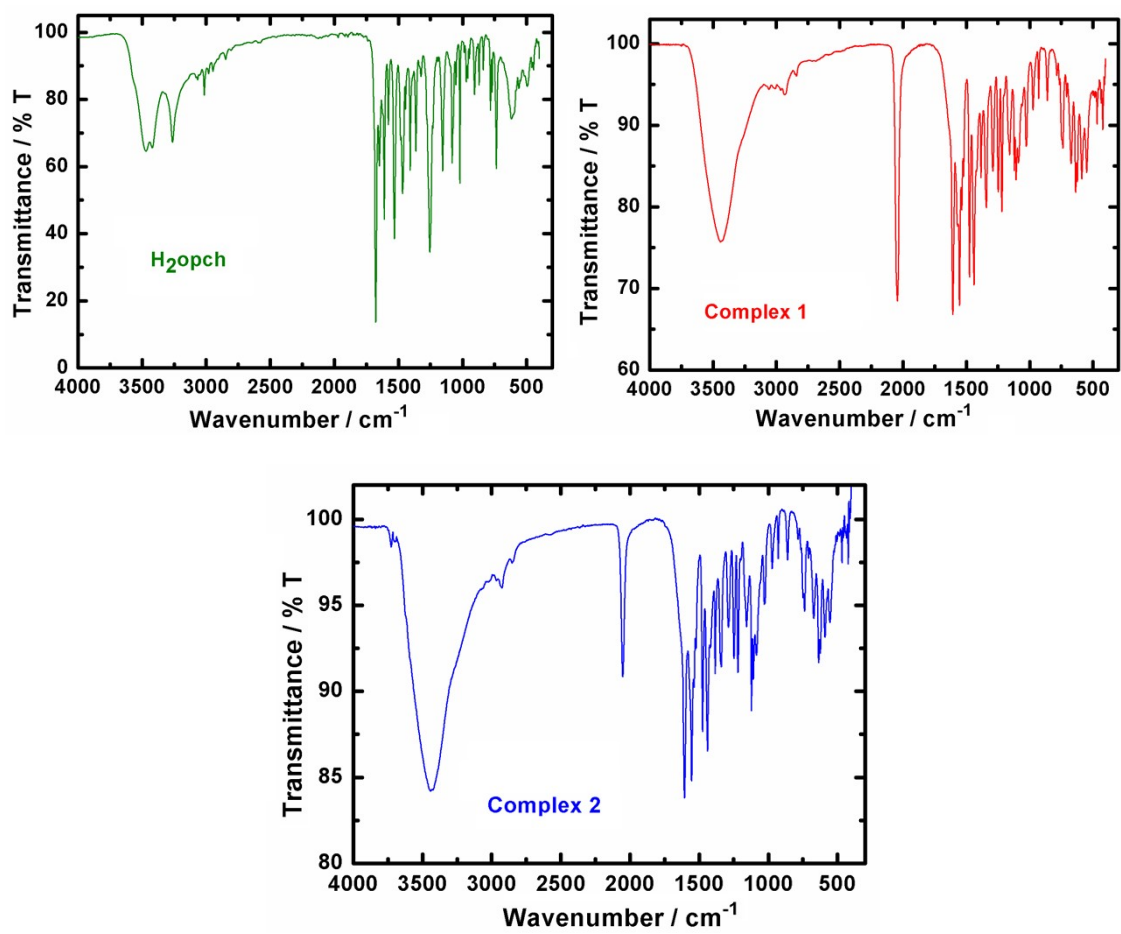

**Figure S1.** Infrared spectra of H<sub>2</sub>opch, 1 and 2.



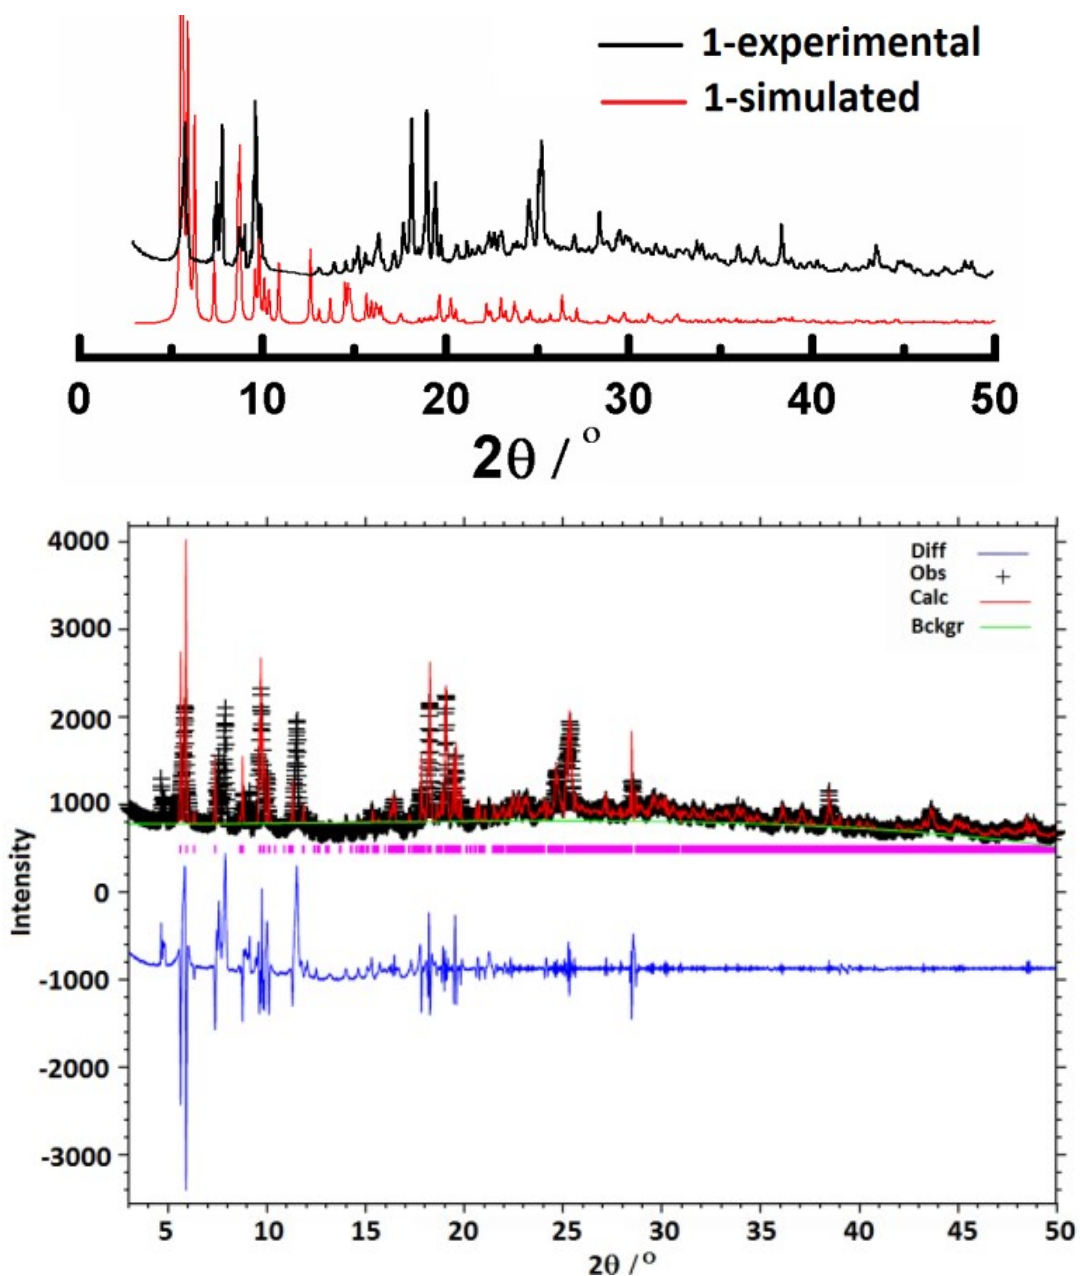

**Figure S2.** Top: the powder XRD patterns for complex **1**. Bottom: the black circles are for the observed data. The red solid line is for the calculated data. The grey solid curve is for the difference. The vertical bars are the positions of Bragg peaks. Cell parameters:  $P\text{-1}$ ,  $a = 12.16 \text{ \AA}$ ,  $b = 16.39 \text{ \AA}$ ,  $c = 17.19 \text{ \AA}$ ,  $\alpha = 112.9^\circ$ ,  $\beta = 94.6^\circ$ ,  $\gamma = 95.8^\circ$ ,  $V = 3036.2 \text{ \AA}^3$  ( $wR_p = 0.145$ ).

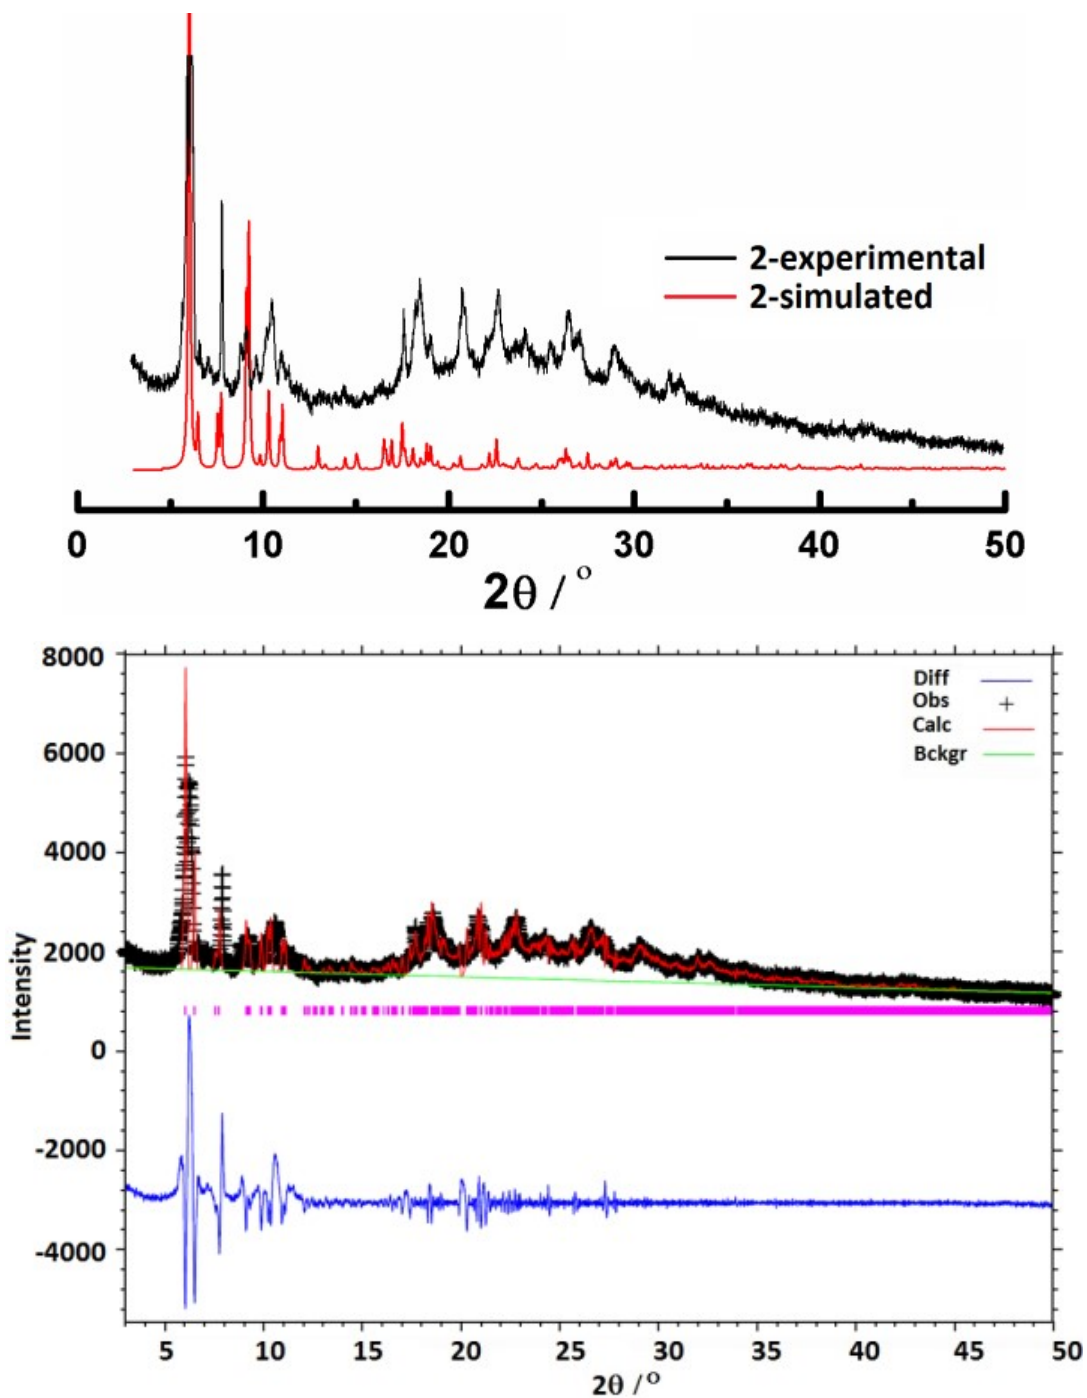

**Figure S3.** Top: the powder XRD patterns for complex **2**. Bottom: the black circles are for the observed data. The red solid line is for the calculated data. The grey solid curve is for the difference. The vertical bars are the positions of Bragg peaks. Cell parameters:

$P2_1/c$ ,  $a = 15.54 \text{ \AA}$ ,  $b = 19.41 \text{ \AA}$ ,  $c = 20.21 \text{ \AA}$ ,  $\alpha = 90.0^\circ$ ,  $\beta = 109.5^\circ$ ,  $\gamma = 90.0^\circ$ ,  $V =$

$5747.4 \text{ \AA}^3$  ( $wRp = 0.093$ ).



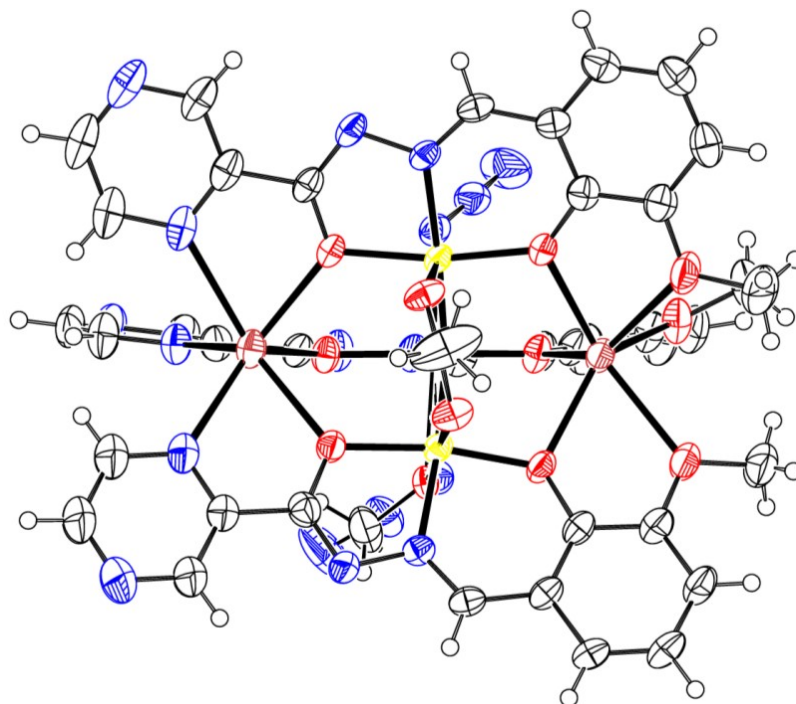

**Figure S4.** Structural figure of complex **1** with probability ellipsoids (probability 50%).

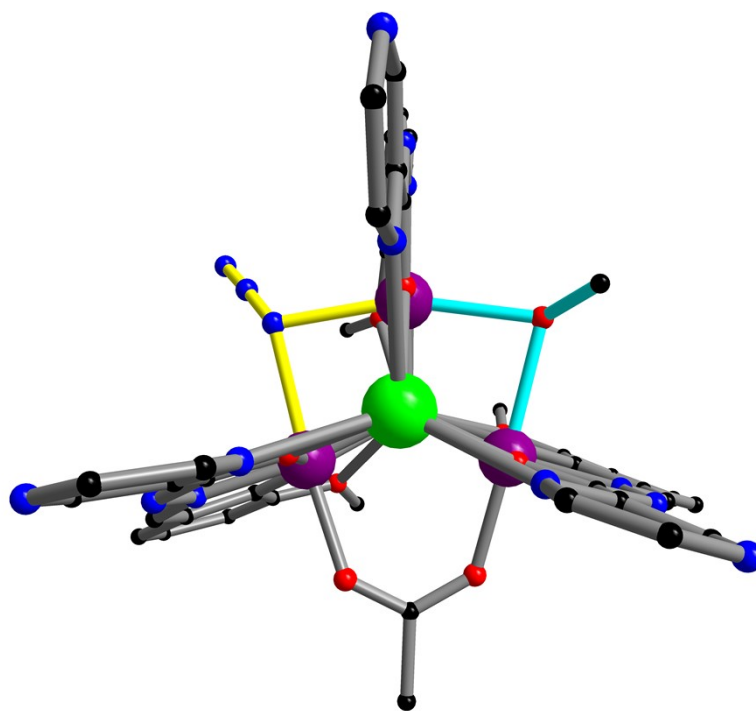

**Figure S5.** Top view of complex **1** in which one azide and one one methanol molecules are depicted as yellow and turquoise frames. Color scheme: violet Mn, bright green Na, red O, blue N, black C.

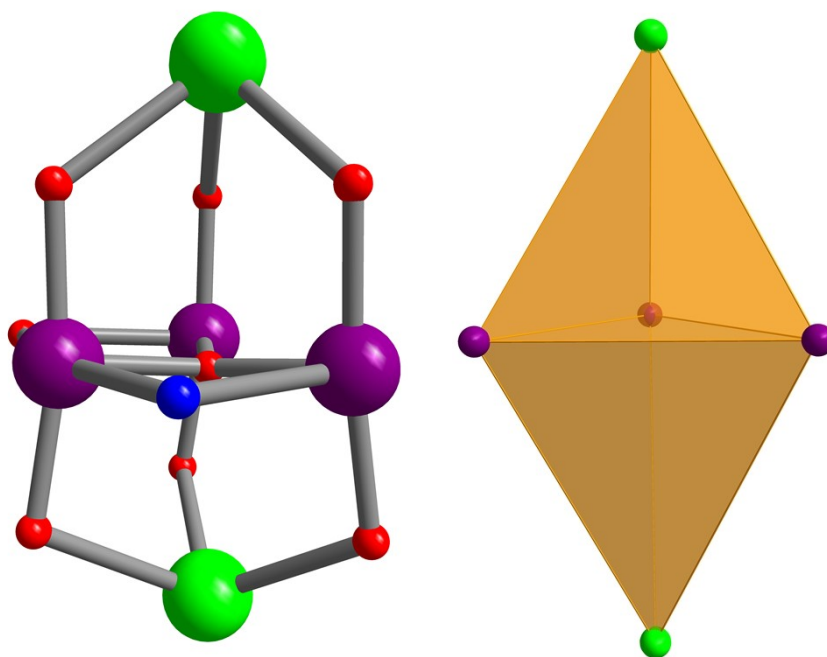

**Figure S6.** Left:  $[\text{Na}_2\text{Mn}_3(\mu_3\text{-O})(\mu_2\text{-N}_3)(\mu_2\text{-O})_7]^{2+}$  core for **1**. Right: the polyhedron of  $\text{Na}_2\text{Mn}_3$ . Color scheme: violet Mn, bright green Na, red O, blue N.

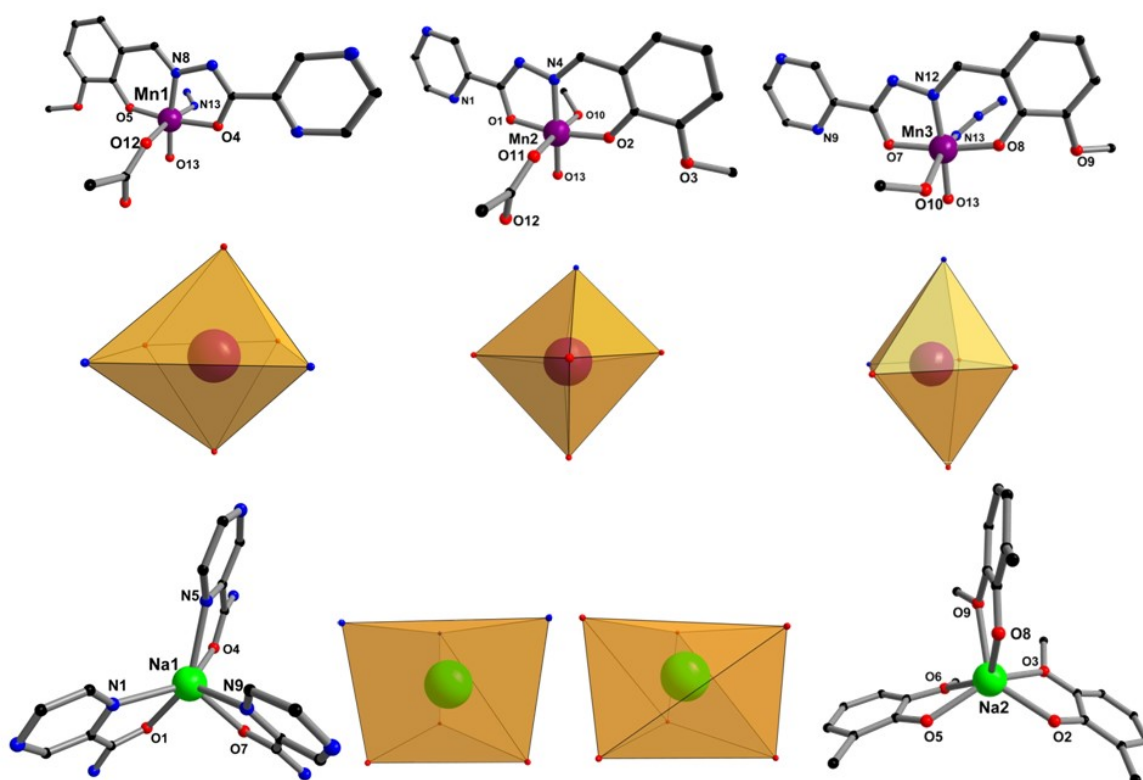

**Figure S7.** Coordination environments of three crystallographically independent Mn ions and two Na ions in **1**. The  $\text{spch}_2^-$  fragments are shown in gray, Mn in violet, Na in bright green, O in red, N in blue, C in black.

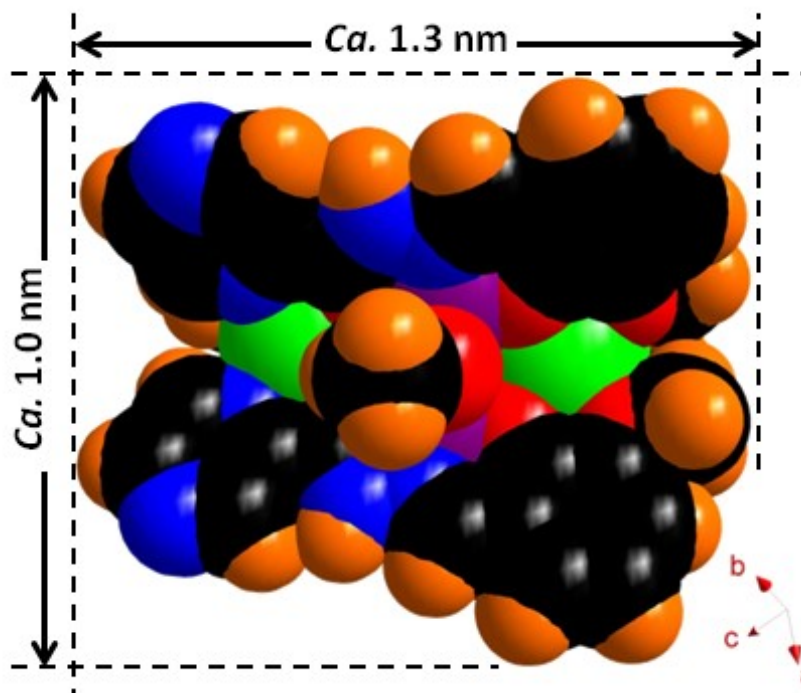

**Figure S8.** Space-filling representation exhibiting the longest (top) and shortest (bottom) diameters of **1**. Color code: Mn in violet, Na in bright green, O in red, N in blue, C in black, H in orange.

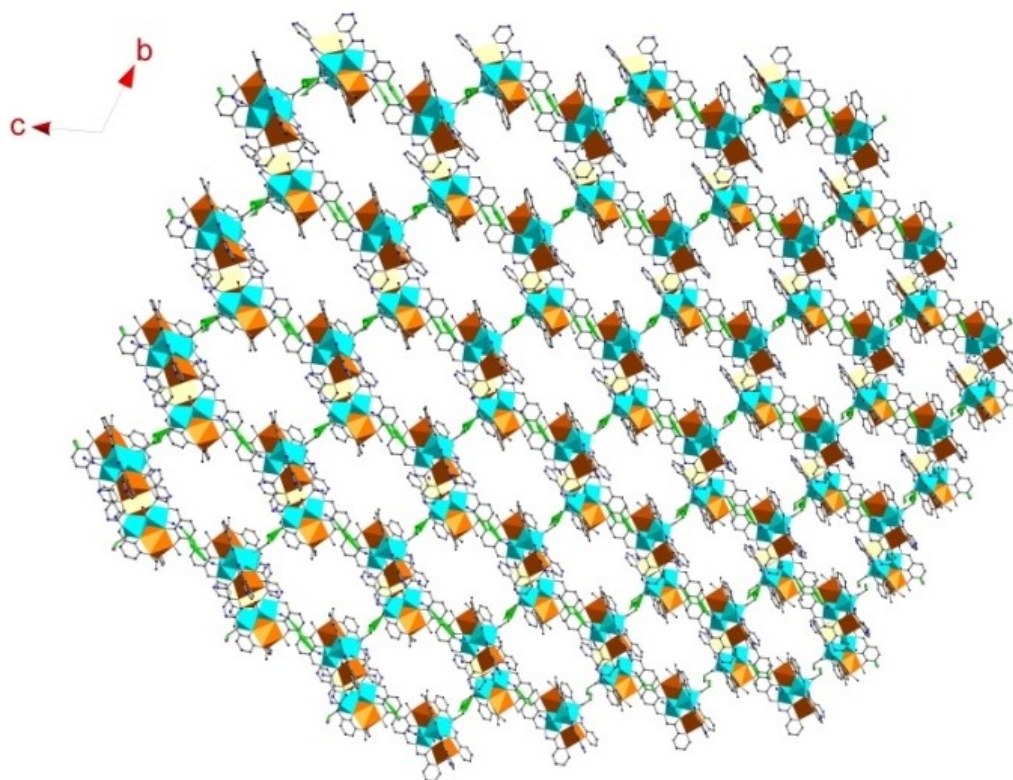

**Figure S9.** Illustration showing the hydrogen-bonding interactions (bright green lines) and the two-dimensional supramolecular arrangement of the molecules in **1**.

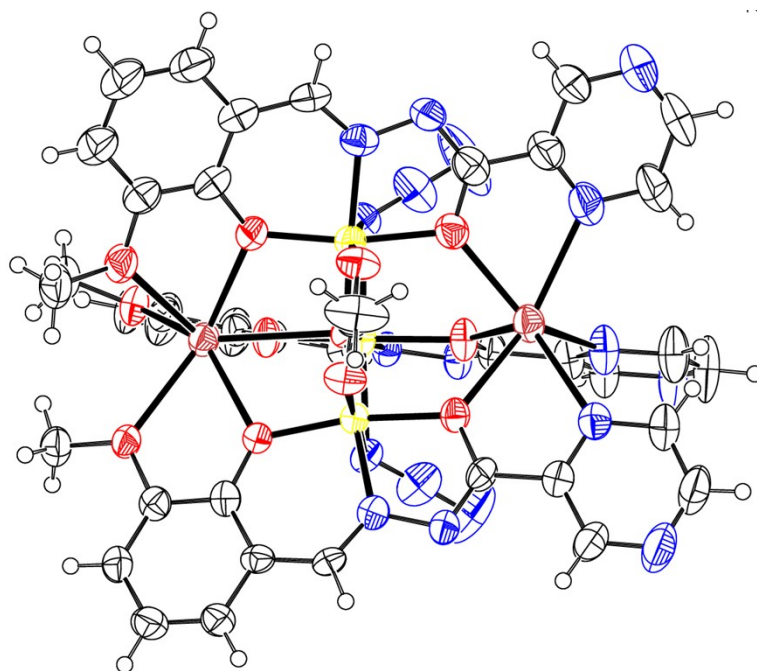

**Figure S10.** Structural figure of complex **2** with probability ellipsoids (probability 50%).

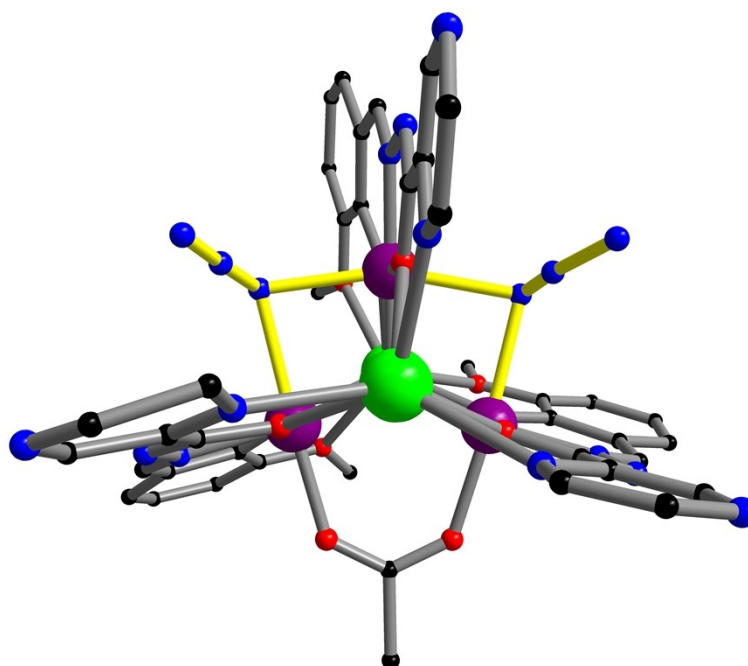

**Figure S11.** Top view of complex **2** in which two azide molecules are depicted as yellow frames. Color scheme: violet Mn, bright green Na, red O, blue N, black C.

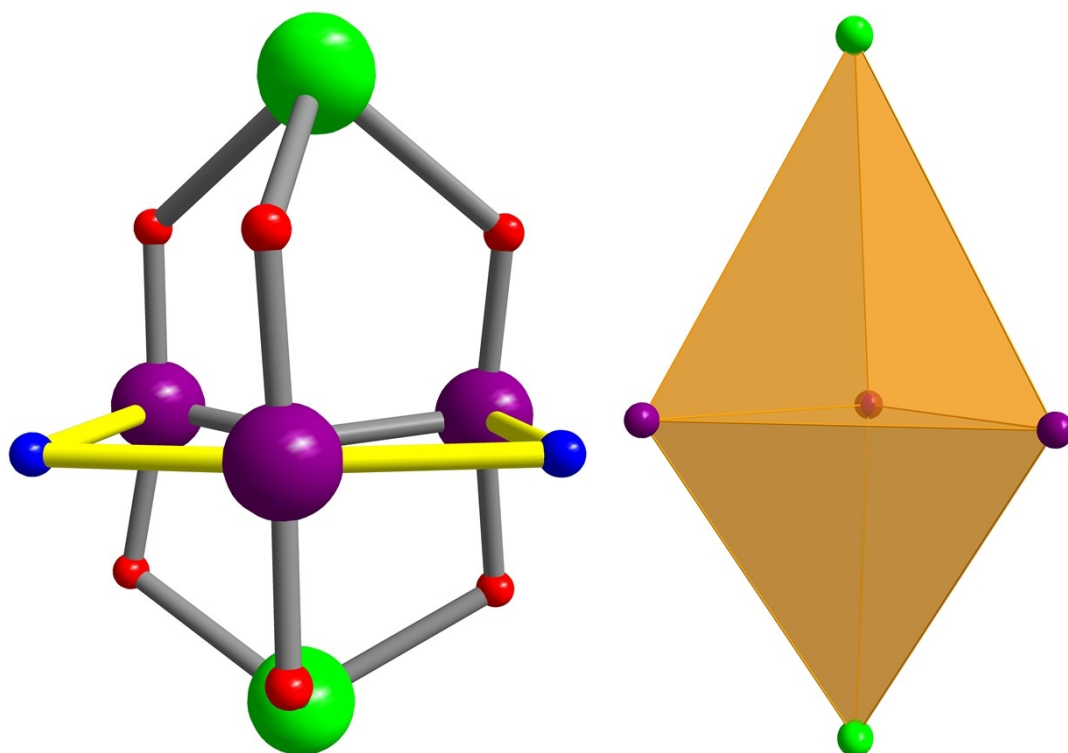

**Figure S12.** Left:  $[\text{Na}_2\text{Mn}_3(\mu_3\text{-O})(\mu_2\text{-N}_3)_2(\mu_2\text{-O})_6]^{2+}$  core for **2**. Right: the polyhedron of  $\text{Na}_2\text{Mn}_3$ . Color scheme: violet Mn, bright green Na, red O, blue N.

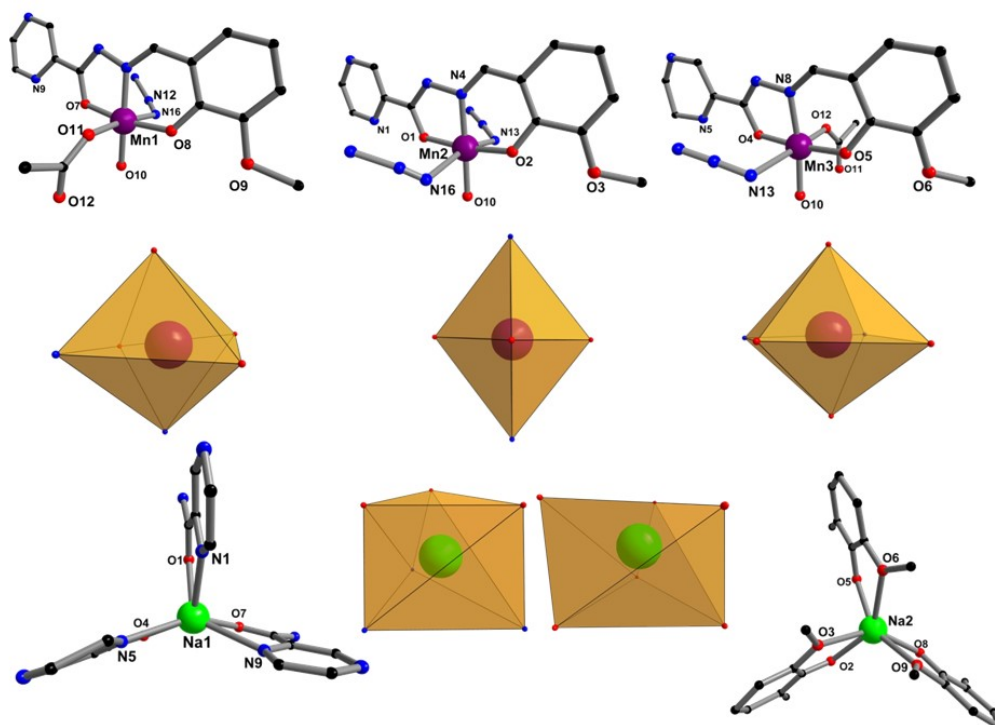

**Figure S13.** Coordination environments of three crystallographically independent Mn ions and two Na ions in **1**. The  $\text{sp}^3\text{d}^2$ -fragments are shown in gray, Mn in violet, Na in bright green, O in red, N in blue, C in black.



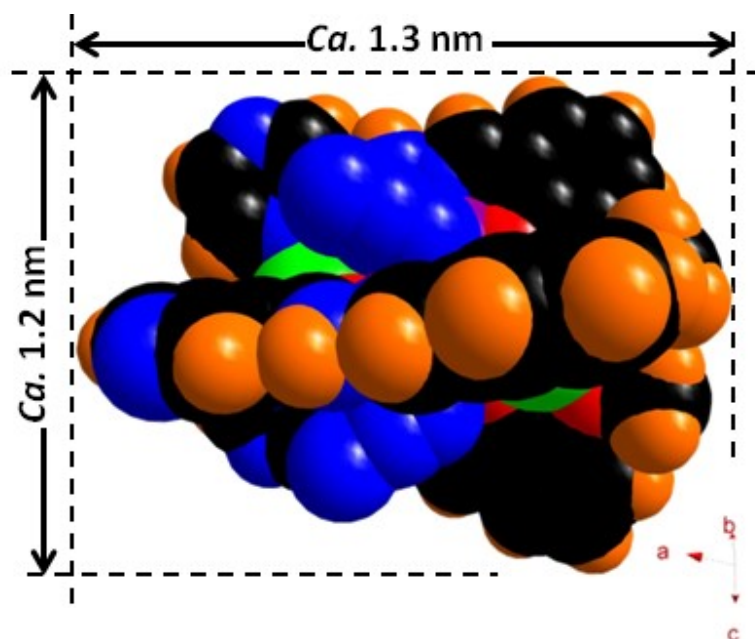

**Figure S14.** Space-filling representation exhibiting outer diameter (top) and thickness (bottom) of **2**. Color code: Dy in gold, O in red, P in pink, H in orange.

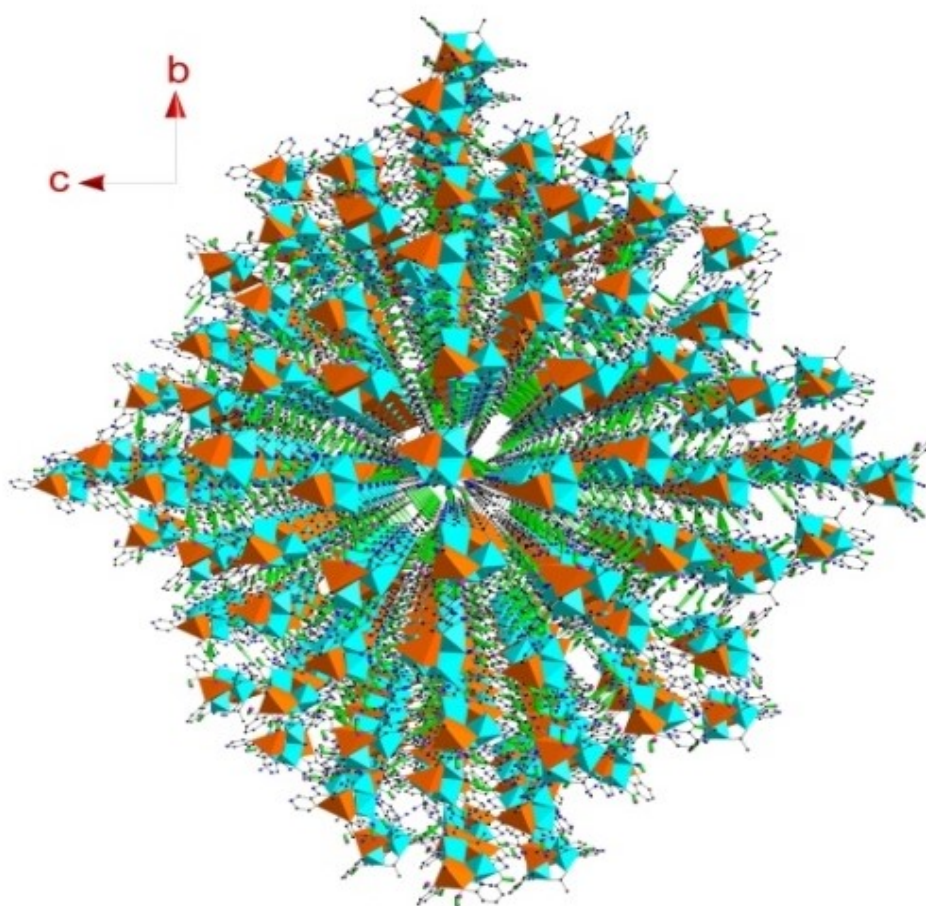

**Figure S15.** Illustration showing the hydrogen-bonding interactions (bright green lines) and the three-dimensional supramolecular arrangement of the molecules in **2**.

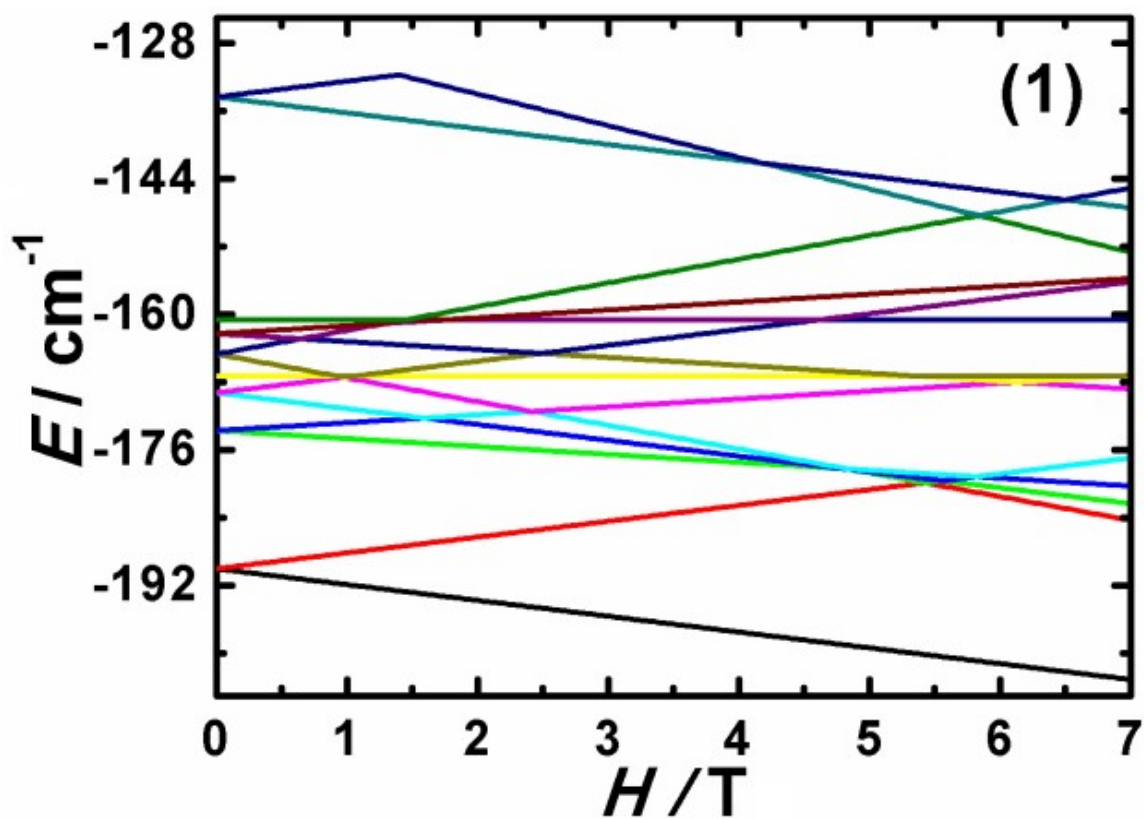

Figure S16. The fitted Zeeman splitting plot of complex 1.

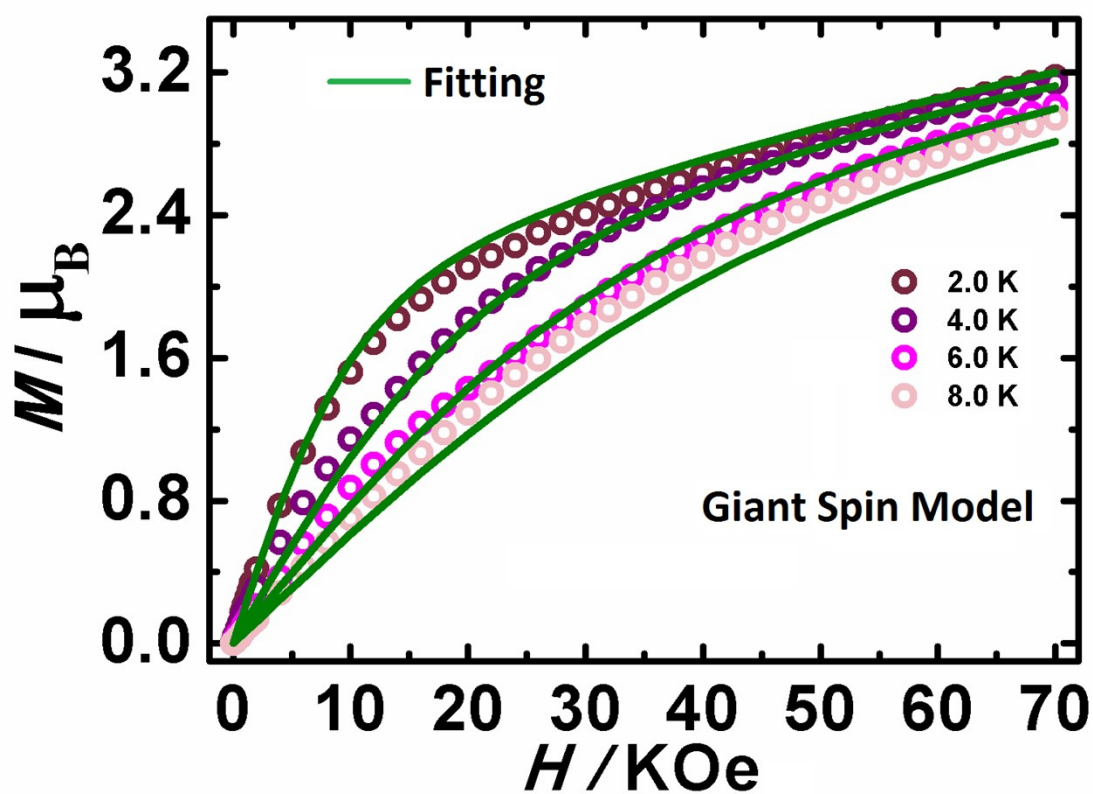

Figure S17. The  $M$  vs.  $H/T$  plot at different temperatures below 8.0 K for 1. The solid line are best-fit curves with  $S_T = 2$  by giant spin approximation (GSA).

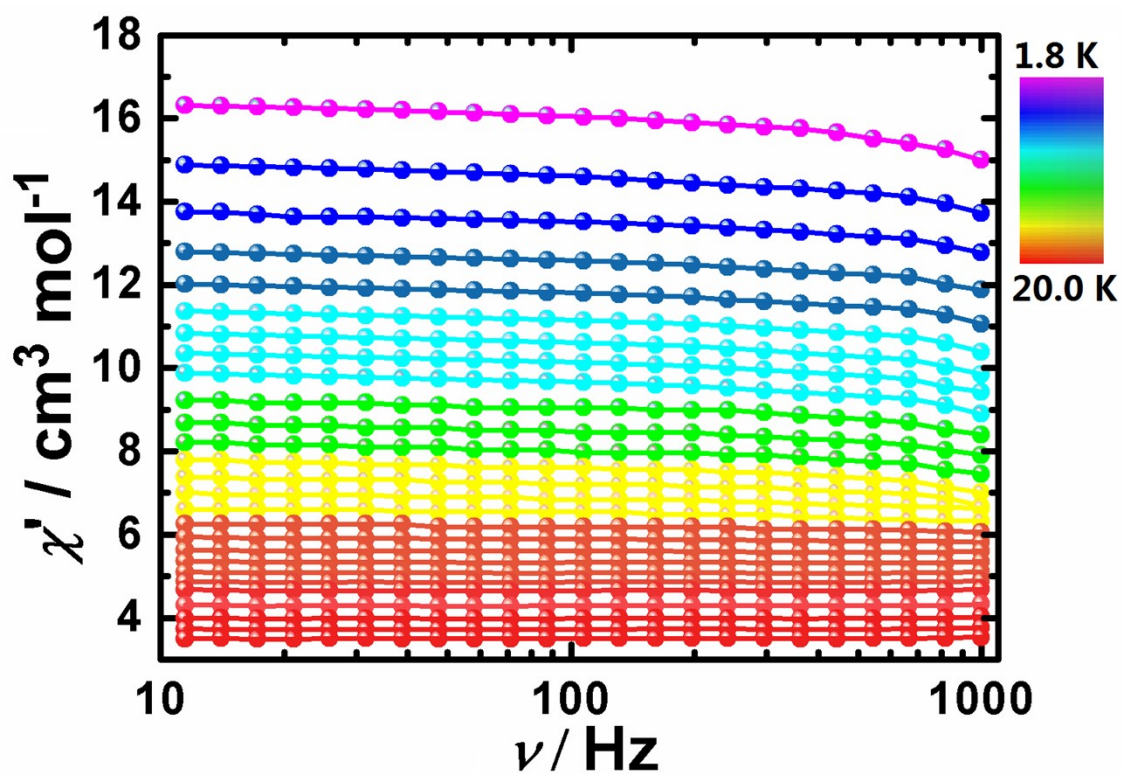

Figure S18. Frequency dependence of the  $\chi'$  product, *ac* susceptibilities under zero *dc* field for 1.

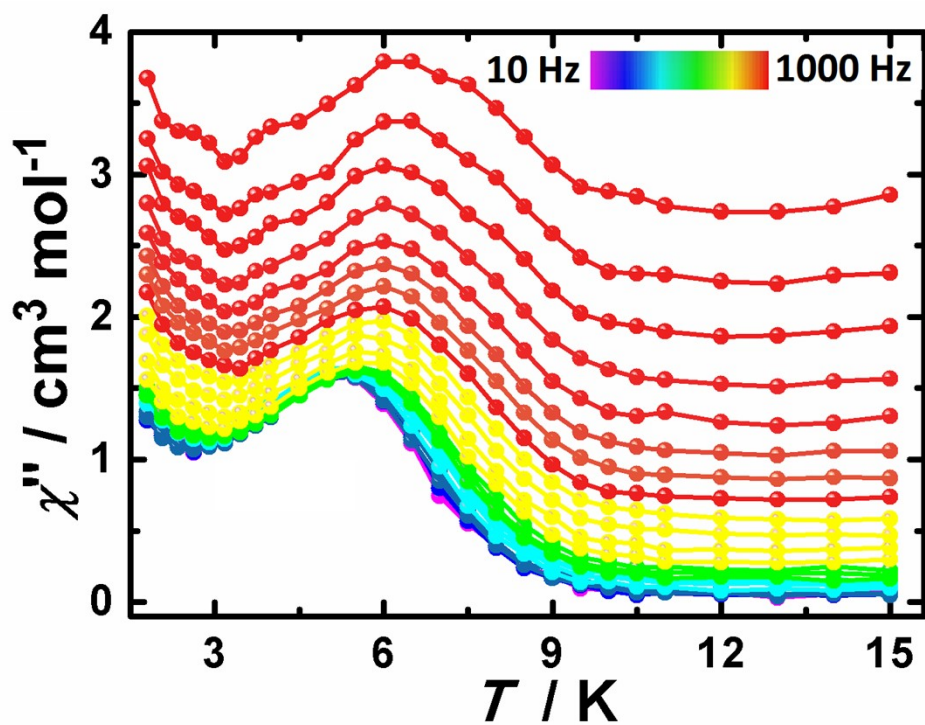

Figure S19. Temperature dependence of the  $\chi''$  product, *ac* susceptibilities under zero *dc* field for 1.

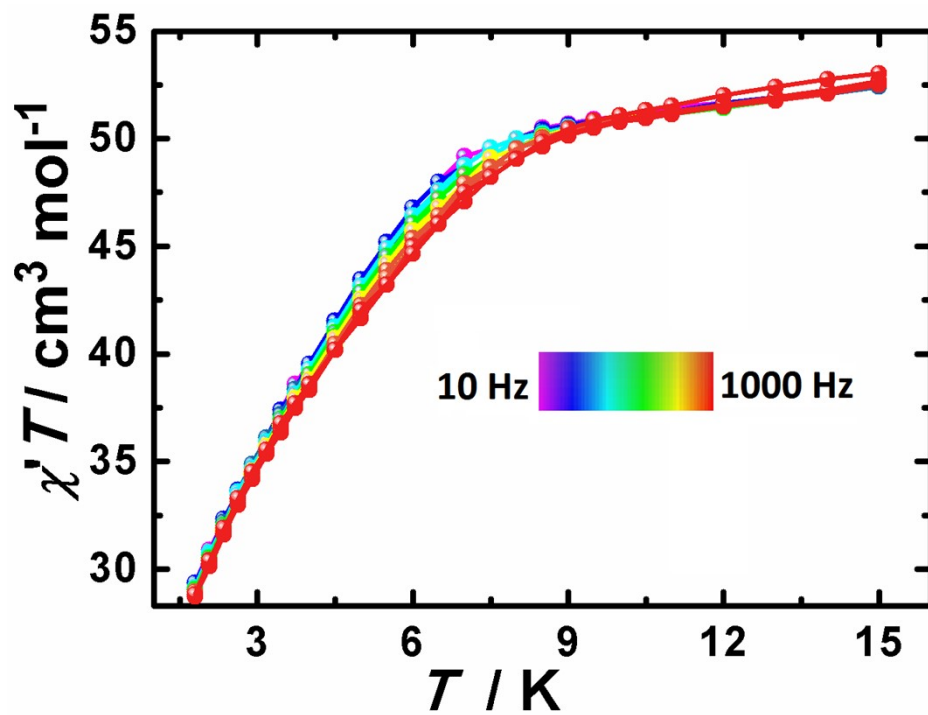

Figure S20. Temperature dependence of the  $\chi'T$  product, *ac* susceptibilities under zero *dc* field for 1.

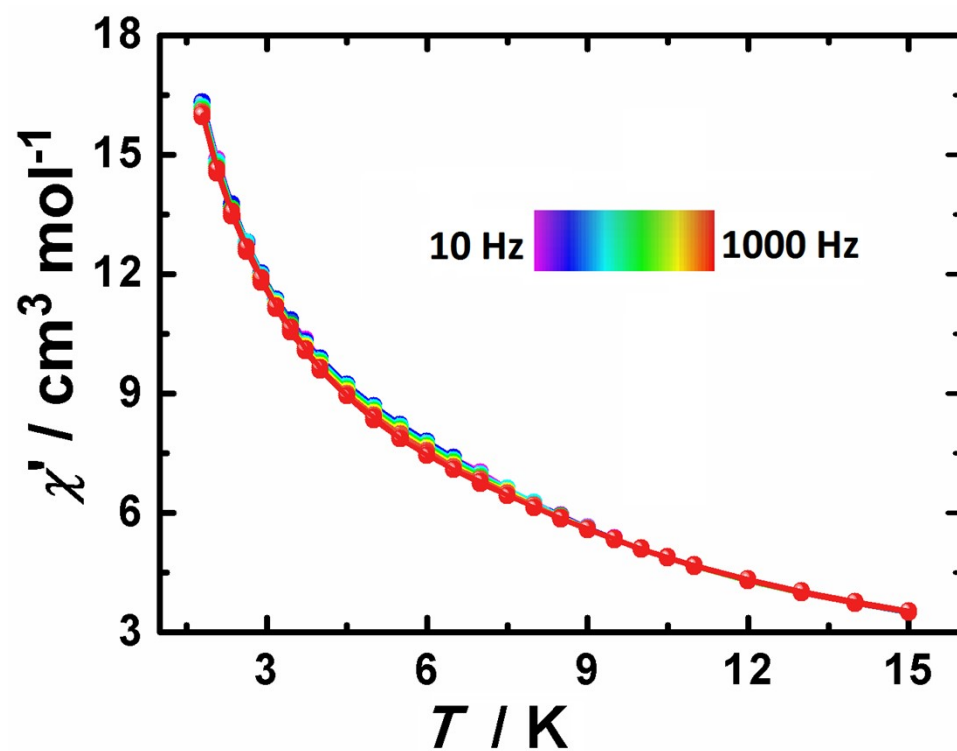

Figure S21. Temperature dependence of the  $\chi'$  product, *ac* susceptibilities under zero *dc* field for 1.

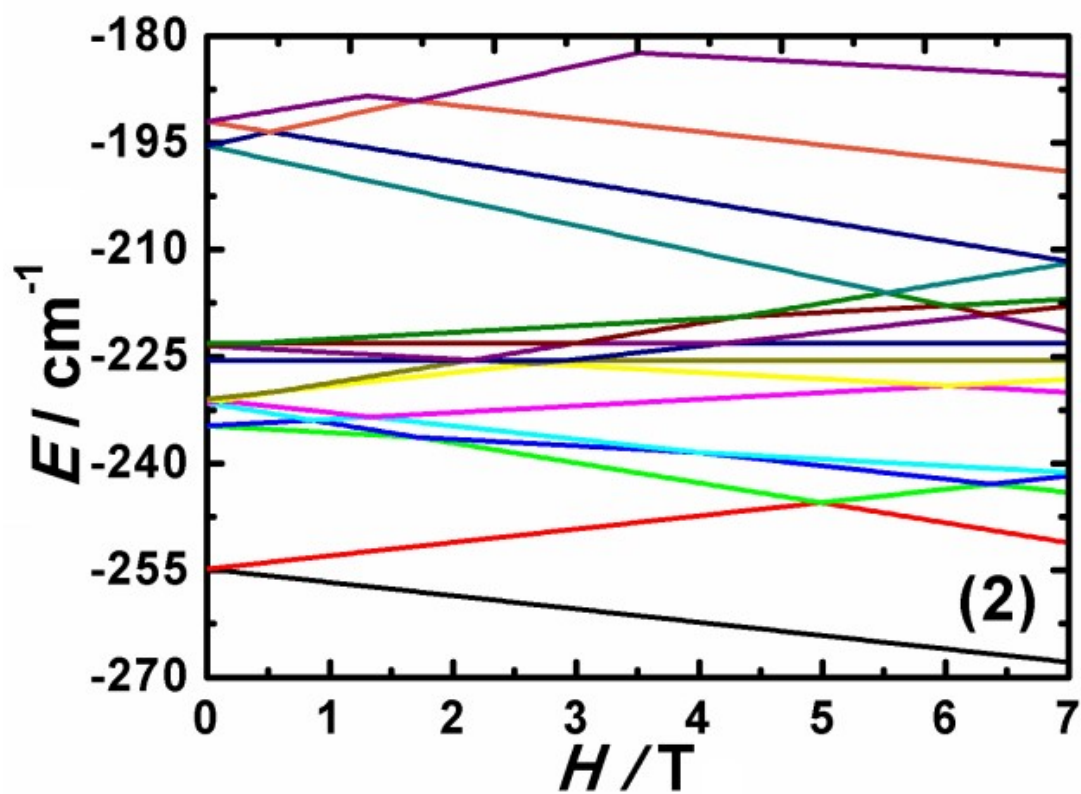

Figure S22. The fitted Zeeman splitting plot of complex 2.

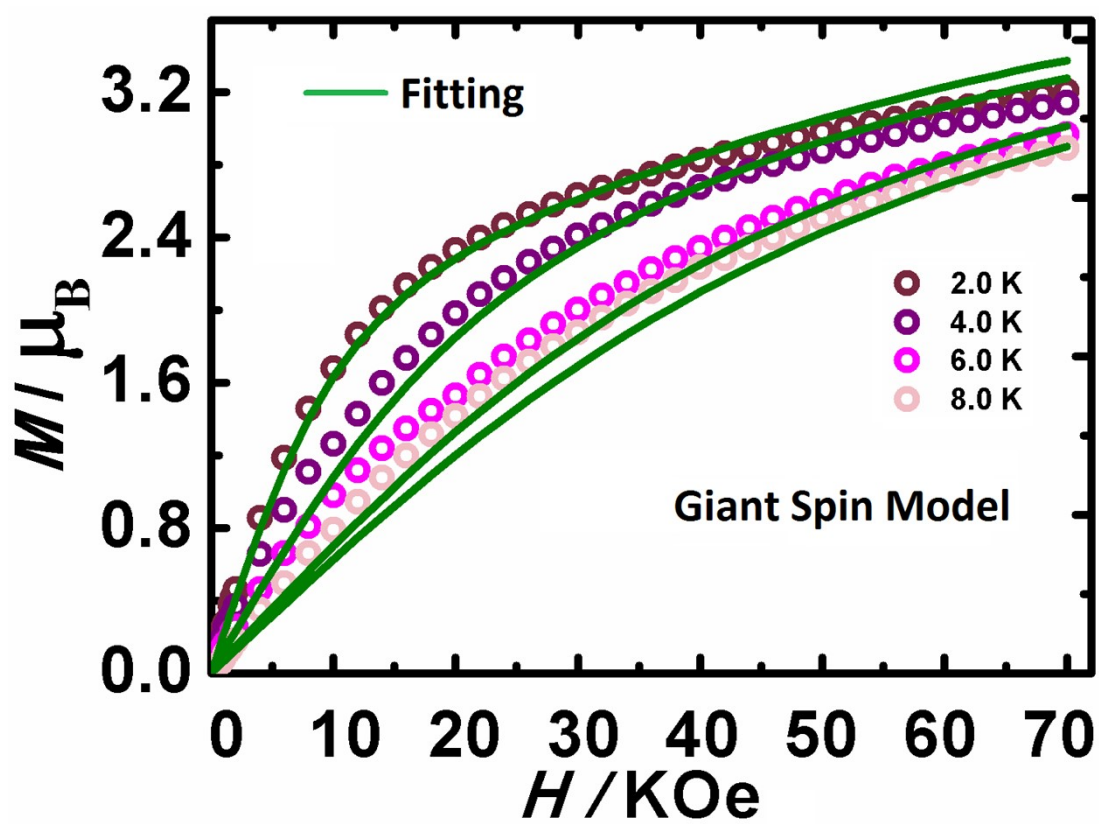

Figure S23. The  $M$  vs.  $H/T$  plot at different temperatures below 8.0 K for 2. The solid line are best-fit curves with  $S_T = 2$  by giant spin approximation (GSA).

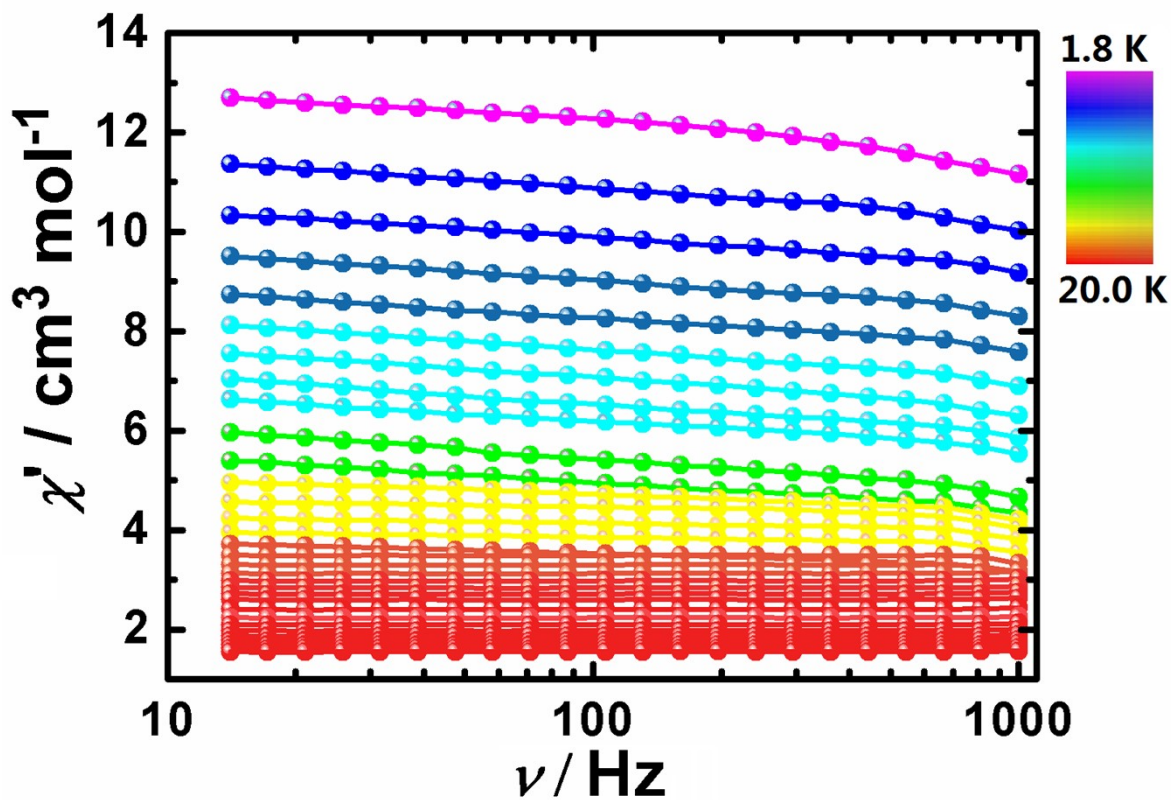

Figure S24. Frequency dependence of the  $\chi'$  product,  $ac$  susceptibilities under zero  $dc$  field for 2.

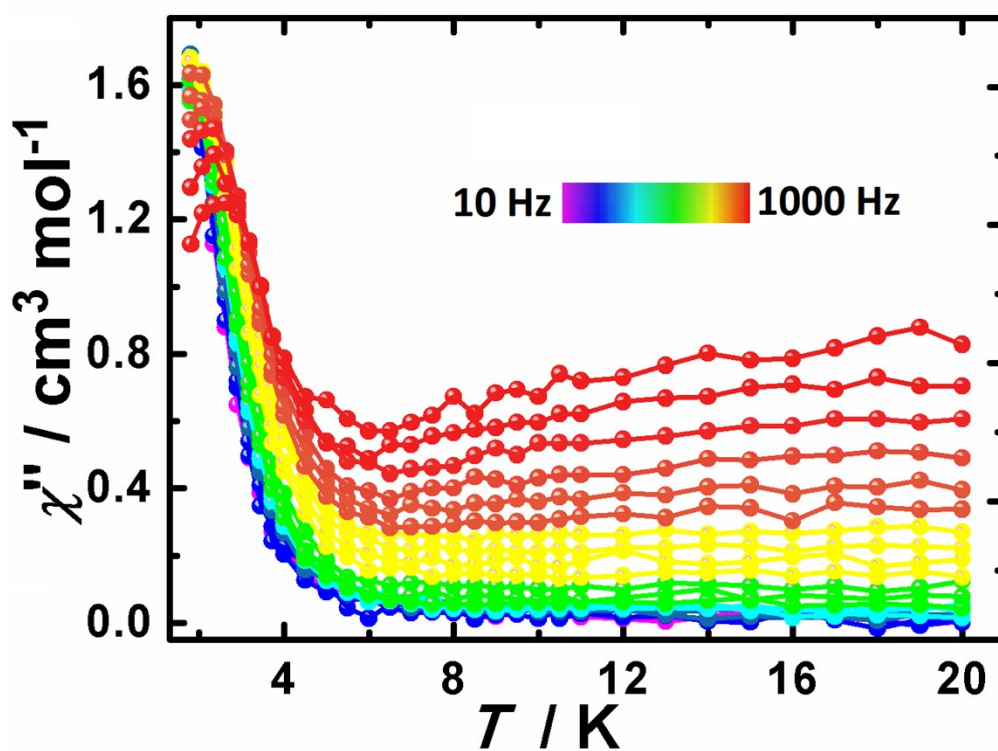

Figure S25. Temperature dependence of the  $\chi''$  product,  $ac$  susceptibilities under zero  $dc$  field for 2.

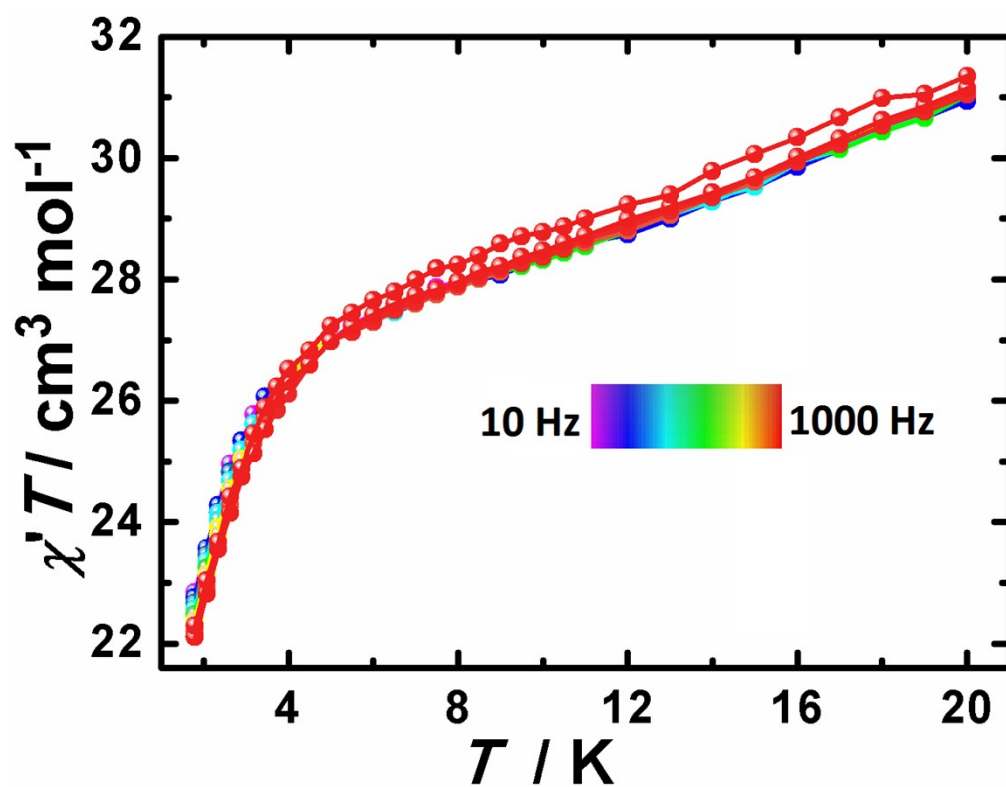

Figure S26. Temperature dependence of the  $\chi'T$  product, *ac* susceptibilities under zero *dc* field for 2.

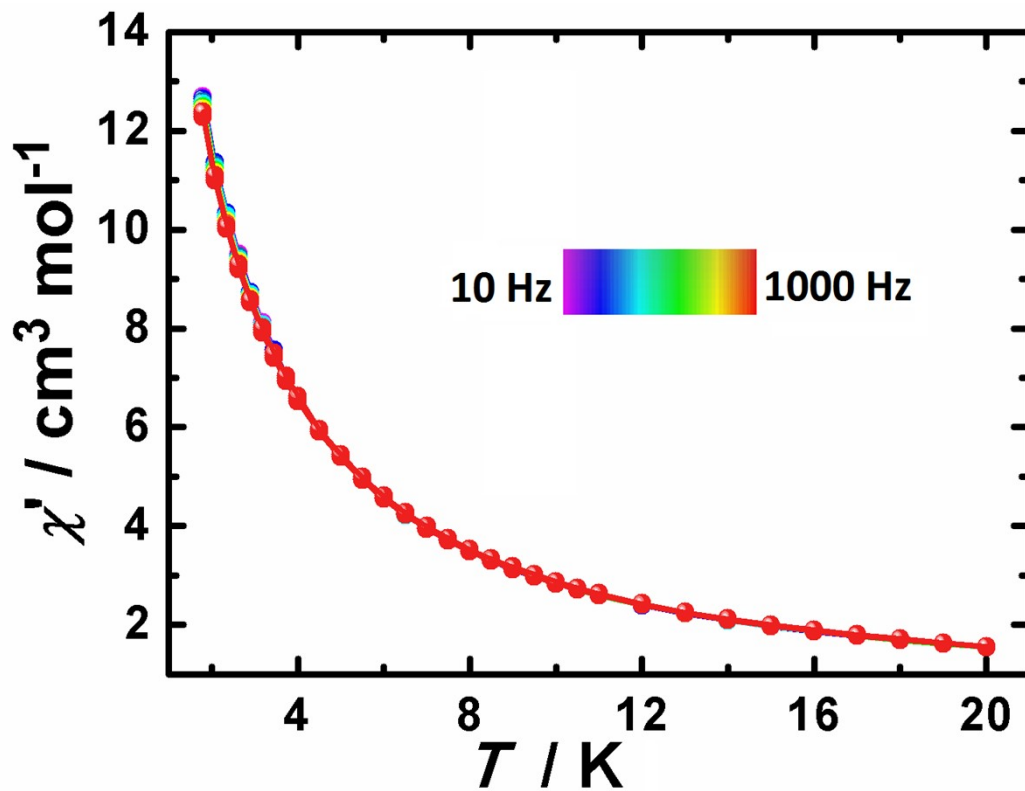

Figure S27. Temperature dependence of the  $\chi'$  product, *ac* susceptibilities under zero *dc* field for 2.

## Theoretical calculation

Using the general algorithm for calculation of Heisenberg exchange constants  $J$  in multispin systems,<sup>S1</sup> we derived the formulas for a three-center system. Calculations of the exchange constants for three centers within BS-DFT were done by ORCA 4.2.1, UKS B3LYP functionals and DKH-def2-SVP basis set were used during calculations.

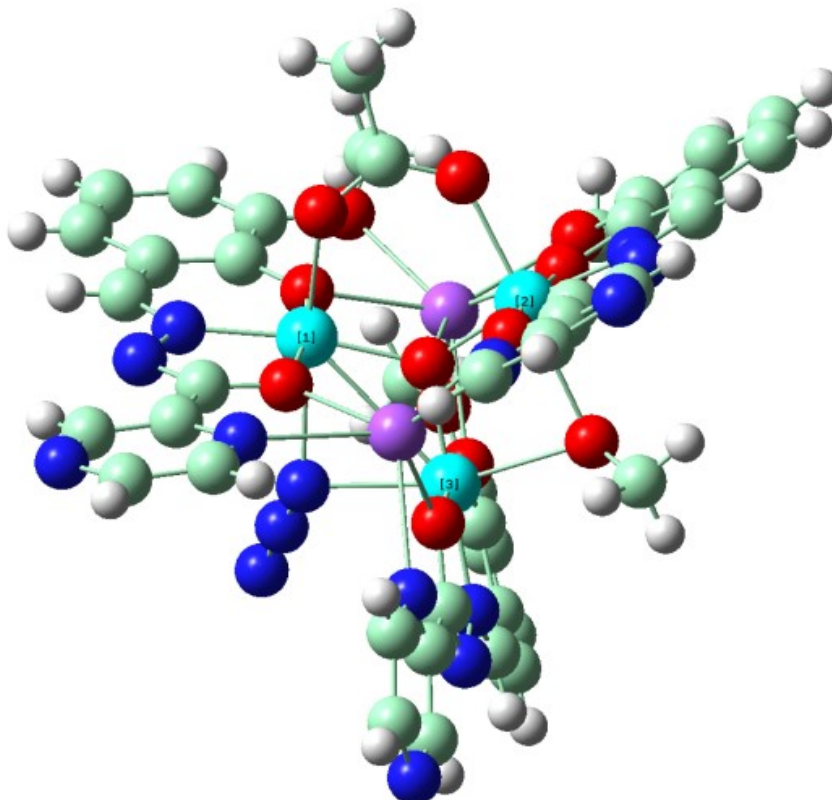

**Figure S28.** The calculation model of complex 1.

**Table S7.** Results of BS-DFT calculations of complex 1. Coupling constants  $J$  have been calculated with Yamaguchi's approach.

| Complex 1 |                   |                       |                      |
|-----------|-------------------|-----------------------|----------------------|
| State     | $E / \text{a.u.}$ | $\langle S^2 \rangle$ | $J / \text{cm}^{-1}$ |
| HS        | -7188.605105      | 42.1024               |                      |
| BS1       | -7188.605463      | 10.0696               | $J_{12} = -11.44$    |
| BS2       | -7188.605386      | 10.0674               | $J_{13} = 7.58$      |
| BS3       | -7188.604078      | 10.0767               | $J_{23} = 6.53$      |



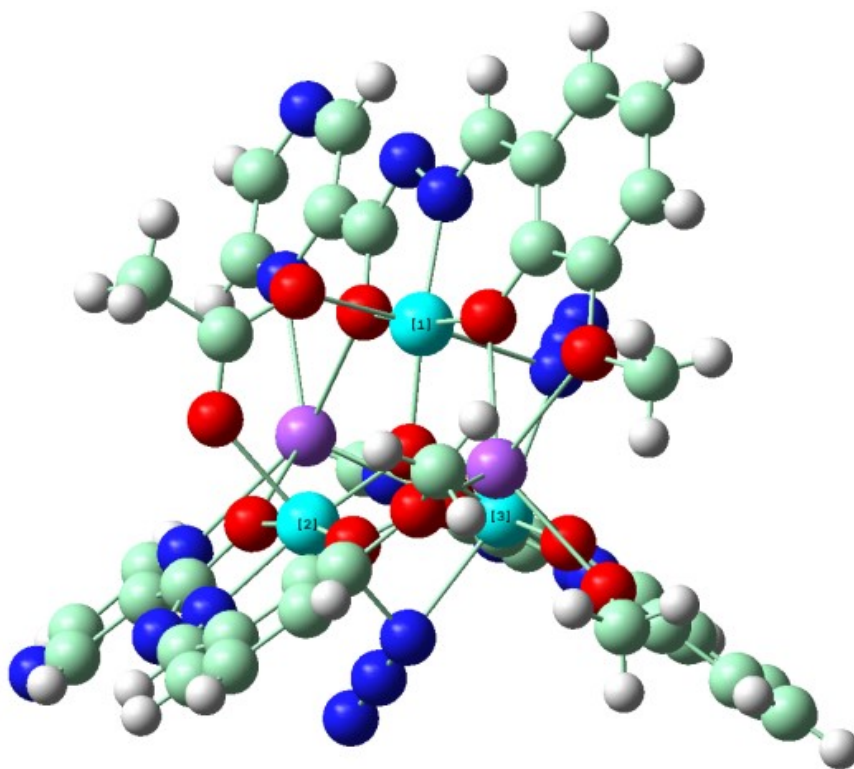

**Figure S29.** The calculation model of complex **2**.

**Table S8.** Results of BS-DFT calculations of complex **2**. Coupling constants  $J$  have been calculated with Yamaguchi's approach.

| Complex <b>2</b> |                   |                       |                      |
|------------------|-------------------|-----------------------|----------------------|
| State            | $E / \text{a.u.}$ | $\langle S^2 \rangle$ | $J / \text{cm}^{-1}$ |
| HS               | -7237.689179      | 42.1113               |                      |
| BS1              | -7237.689399      | 10.0784               | $J_{12} = -9.77$     |
| BS2              | -7237.689356      | 10.0792               | $J_{13} = 7.34$      |
| BS3              | -7237.688153      | 10.0869               | $J_{23} = 6.75$      |

**References:**

- S1 M. Shoji, K. Koizumi, Y. Kitagawa, T. Kawakami, S. Yamanaka, M. Okumura, K. Yamaguchi, *Chem. Phys. Lett.*, **2006**, 432, 343-347.
